# Supplementary material
Source: publisher site journal article supplement (http://www.spandidos-publications.com/6129/downloadSupplementary)
Supplement: Supplementary file 1 [file downloadSupplementary]

Table SI. Detailed quality assessment of the included cohort studies.

| Author, year                  | Enrollment criteria                                  | Interventions                                      | Treatment duration before surgery | Treatment-related adverse effects graded $\geq 3$          | (Refs.) |
|-------------------------------|------------------------------------------------------|----------------------------------------------------|-----------------------------------|------------------------------------------------------------|---------|
| Hatiboglu <i>et al</i> , 2017 | Clinical stage 1-3 RCC                               | Sorafenib + surgery vs. placebo + surgery          | 5-24 days, 28 days                | Hand foot syndrome, hypertension and generalized exanthema | (19)    |
| Voylenko <i>et al</i> , 2020  | Localized RCC                                        | Pazopanib + surgery vs. surgery alone              | 2 cycles, 8 weeks                 | NA                                                         | (20)    |
| Semko <i>et al</i> , 2021     | Localized RCC                                        | Pazopanib + surgery vs. surgery alone              | 2 cycles, 8 weeks                 | NA                                                         | (22)    |
| McDonald <i>et al</i> , 2018  | Patients with RCC who underwent PN                   | Sunitinib + surgery vs. surgery alone              | 2 cycles, 6 weeks                 | NA                                                         | (25)    |
| Harshman <i>et al</i> , 2013  | Advanced RCC                                         | sunitinib or sorafenib + surgery vs. surgery alone | 17 weeks <sup>a</sup>             | NA                                                         | (27)    |
| Okamura <i>et al</i> , 2019   | Advanced RCC with level III or IV IVC tumor thrombus | Pazopanib + surgery vs. surgery alone              | 12 weeks                          | Thrombocytopenia and hand foot syndrome                    | (24)    |
| Chapin <i>et al</i> , 2011    | Metastatic RCC                                       | Targeted therapy + surgery vs. surgery alone       | 1.4 months <sup>a</sup>           | NA                                                         | (26)    |
| Tanaka <i>et al</i> , 2018    | Patients with RCC with IVC thrombus                  | Axitinib + surgery vs. surgery alone               | NA                                | Hypertension and diarrhea                                  | (23)    |
| Field <i>et al</i> , 2019     | Patients with RCC with tumor thrombus                | Sunitinib + surgery vs. surgery alone              | 3 cycles                          | NA                                                         | (21)    |

<sup>a</sup>Mean.RCC, renal cell carcinoma; PN, partial nephrectomy; IVC, inferior vena cava; NA, not available.

Table SII.NOS scoring of the studies included in the meta-analysis.

| NOS item                                                                 | McDonald <i>et al</i> (25) | Harshman <i>et al</i> (27) | Okamura <i>et al</i> (24) | Chapin <i>et al</i> (26) | Tanaka <i>et al</i> (23) | Field <i>et al</i> (21) |
|--------------------------------------------------------------------------|----------------------------|----------------------------|---------------------------|--------------------------|--------------------------|-------------------------|
| Selection                                                                |                            |                            |                           |                          |                          |                         |
| Representativeness of the exposed cohort                                 | *                          | *                          | *                         | *                        | *                        | *                       |
| Selection of the non-exposed cohort                                      | *                          | *                          | *                         | *                        | *                        | *                       |
| Ascertainment of exposure                                                | *                          | *                          | *                         | *                        | *                        | *                       |
| Demonstration that outcome of interest was not present at start of study | *                          | *                          | *                         | *                        | *                        | *                       |
| Comparability                                                            |                            |                            |                           |                          |                          |                         |
| Comparability of cohorts on basis of the design or analysis              | *                          | *                          | **                        | *                        | **                       | **                      |
| Outcome                                                                  |                            |                            |                           |                          |                          |                         |
| Assessment of outcome                                                    | *                          | *                          | *                         | *                        | *                        | *                       |
| Was follow-up long enough for outcomes to occur?                         |                            | *                          |                           | *                        |                          | *                       |
| Adequacy of follow-up of cohorts                                         | *                          | *                          | *                         | *                        | *                        | *                       |
| Total                                                                    | 7                          | 8                          | 8                         | 8                        | 8                        | 9                       |

A study can be awarded a maximum of one star for each numbered item within the ‘Selection’ and ‘Outcome’ categories. A maximum of two stars can be given for ‘Comparability’. Studies rated  $\geq 6$  are eligible for inclusion in the meta-analysis. NOS, Newcastle-Ottawa Scale.
